# Supplementary material
Source: PubMed Central journal article supplement (PMC8026704)

# Bionano Calls (>=5kbp) and Clusters at High Confidence Regions (<= 2 maps aligned)

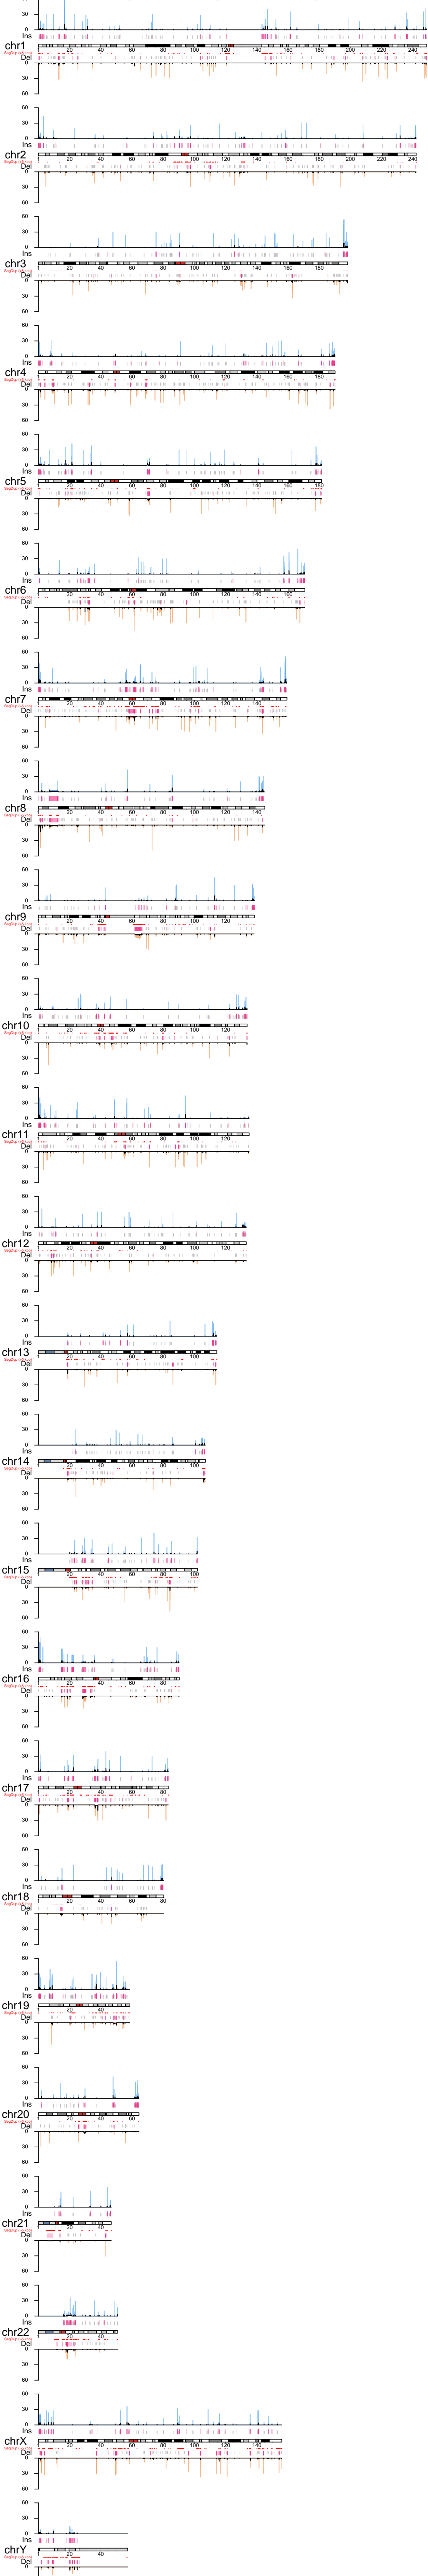

Supplement: NIHMS1680320-supplement-Supplementary_Fig__S52.pdf [file NIHMS1680320-supplement-Supplementary_Fig__S52.pdf]
